# Supplementary material
Source: publisher site journal article supplement (https://www.dovepress.com/article/supplementary_file/552710/552710-Fig%20S1-S6%20and%20Table%20S1-S4.docx)
Supplement: Supplementary file 1 [file 552710-Fig%20S1-S6%20and%20Table%20S1-S4.docx]

**Supplementary figure 1**

**
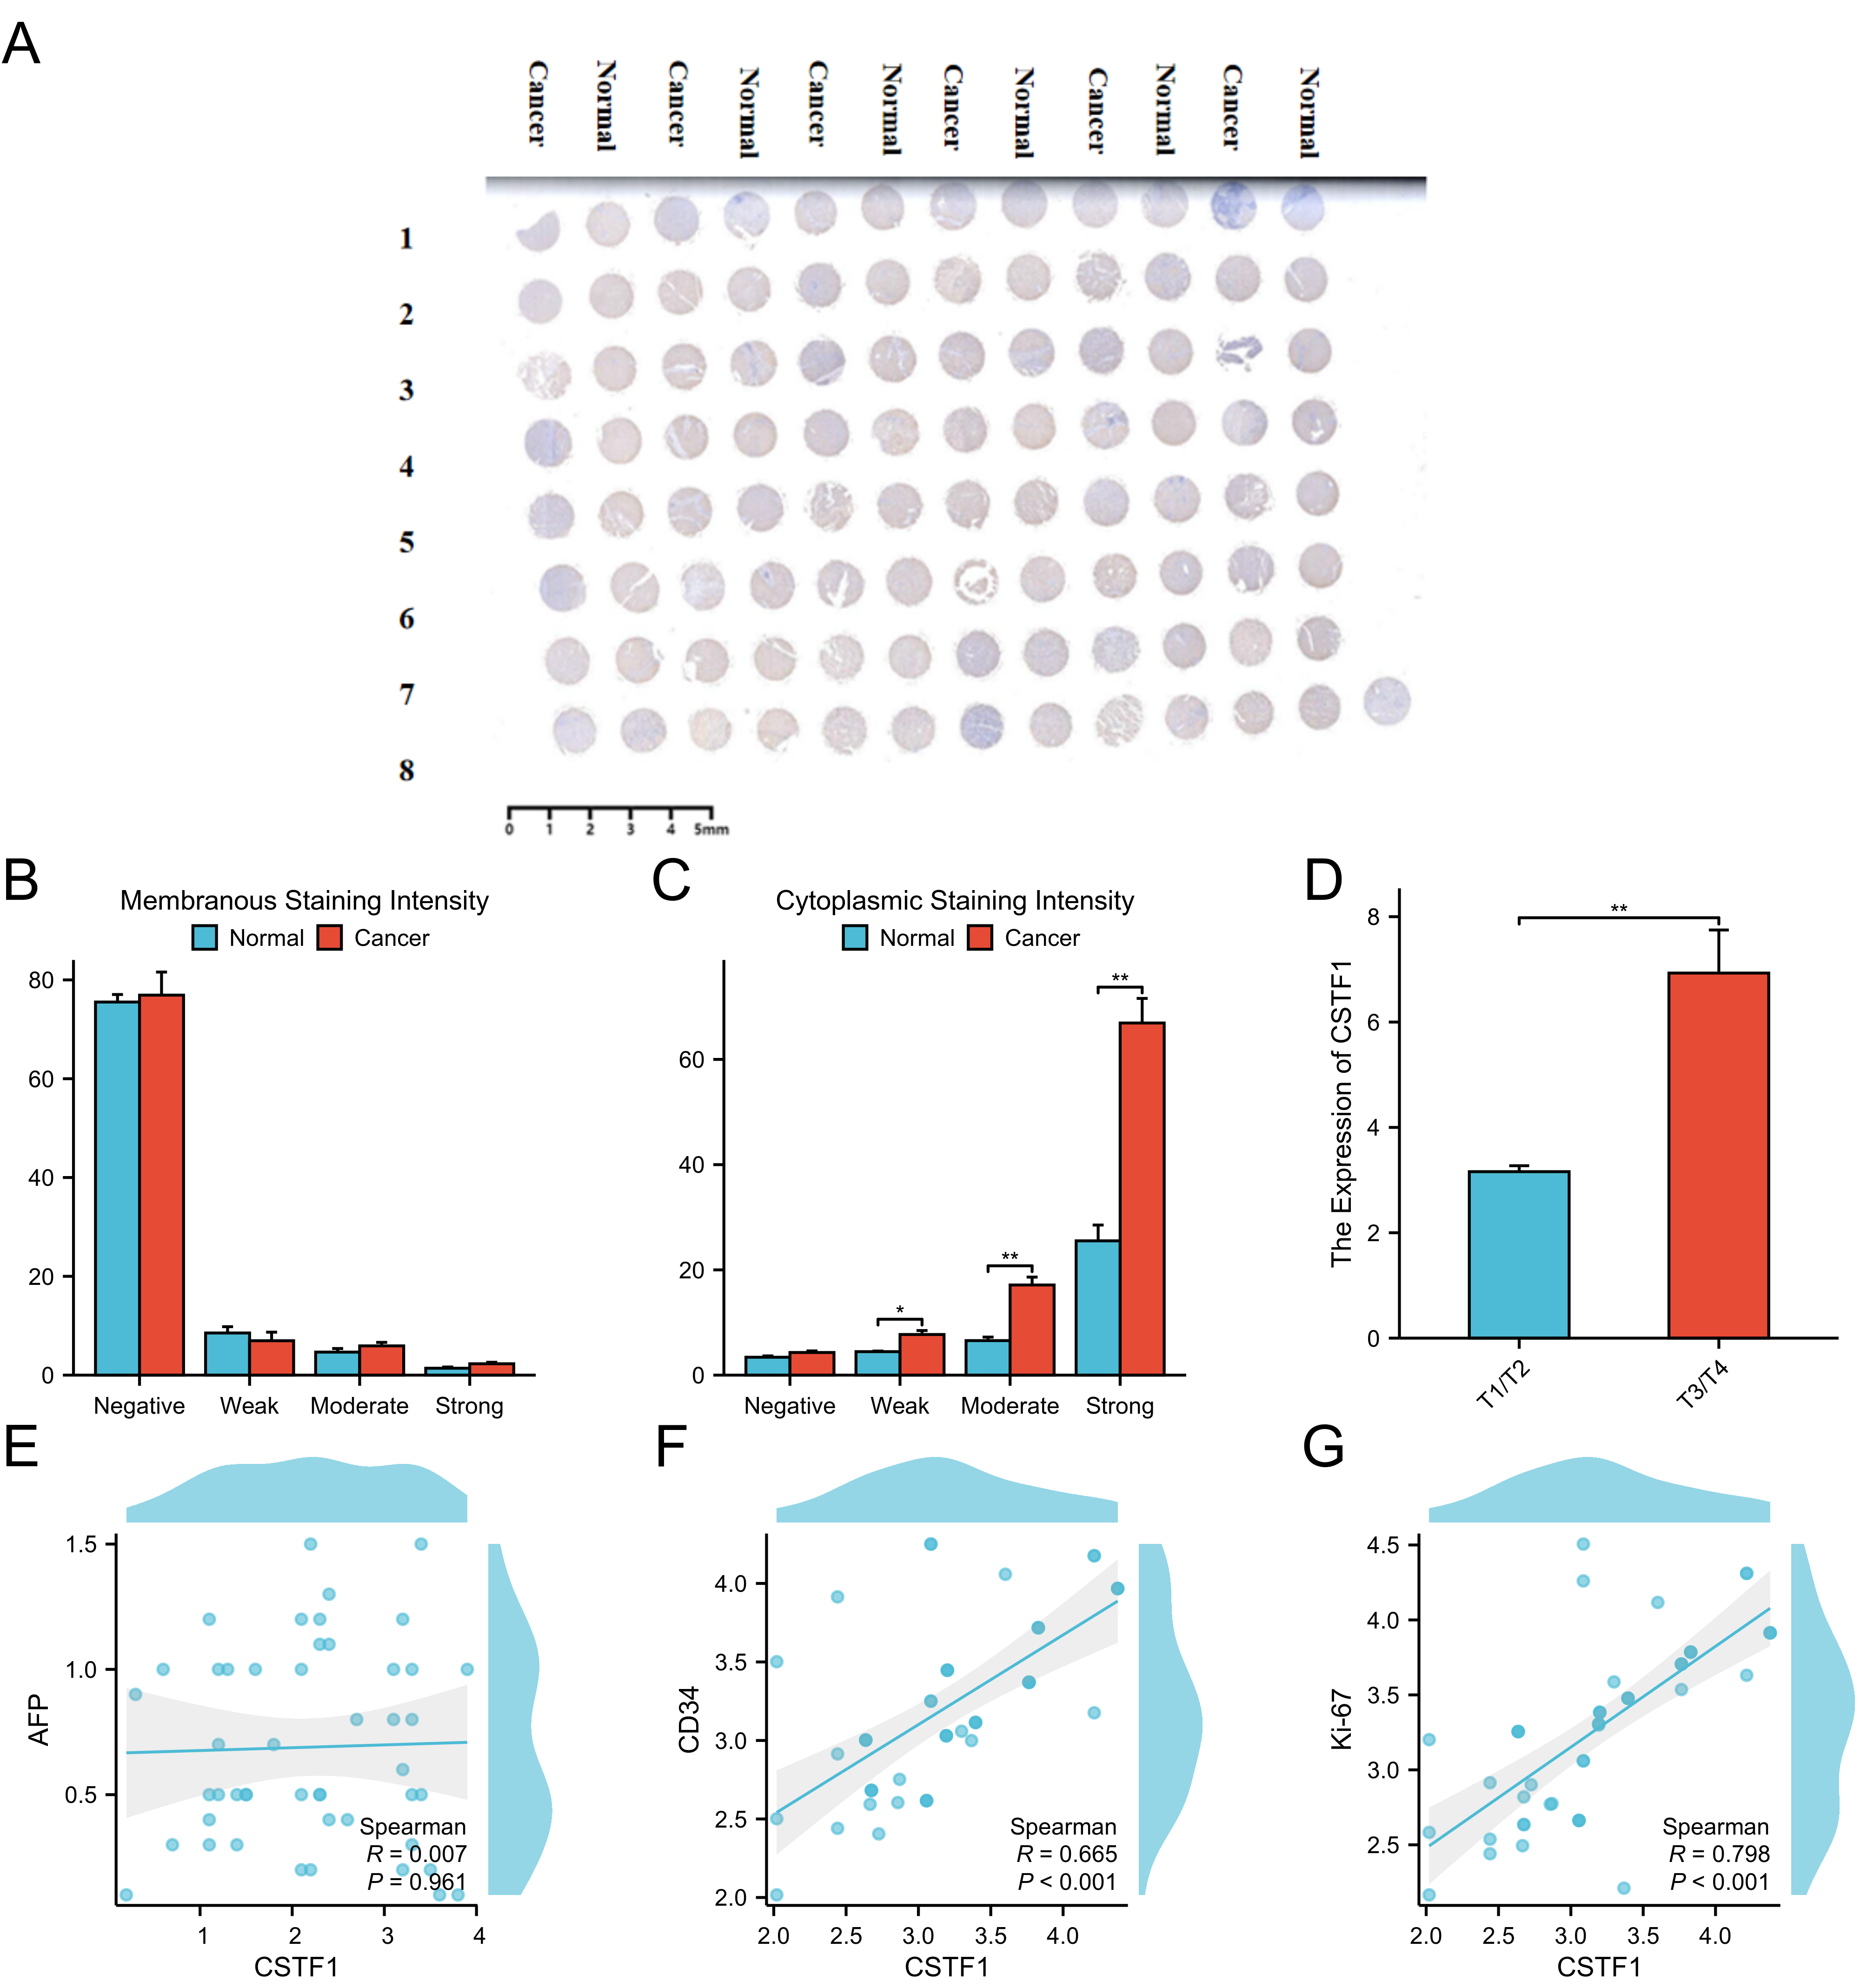
**

**Supplementary Figure 1. Tissue microarray analysis of CSTF1 expression in HCC.** (A) HCC tissue microarray. (B) Membrane staining intensity of CSTF1. (C) Cytoplasmic staining intensity of CSTF1. (D) Pathologic T stage. (E) AFP. (F) CD34. (G) Ki-67.

**Supplementary figure 2**

**
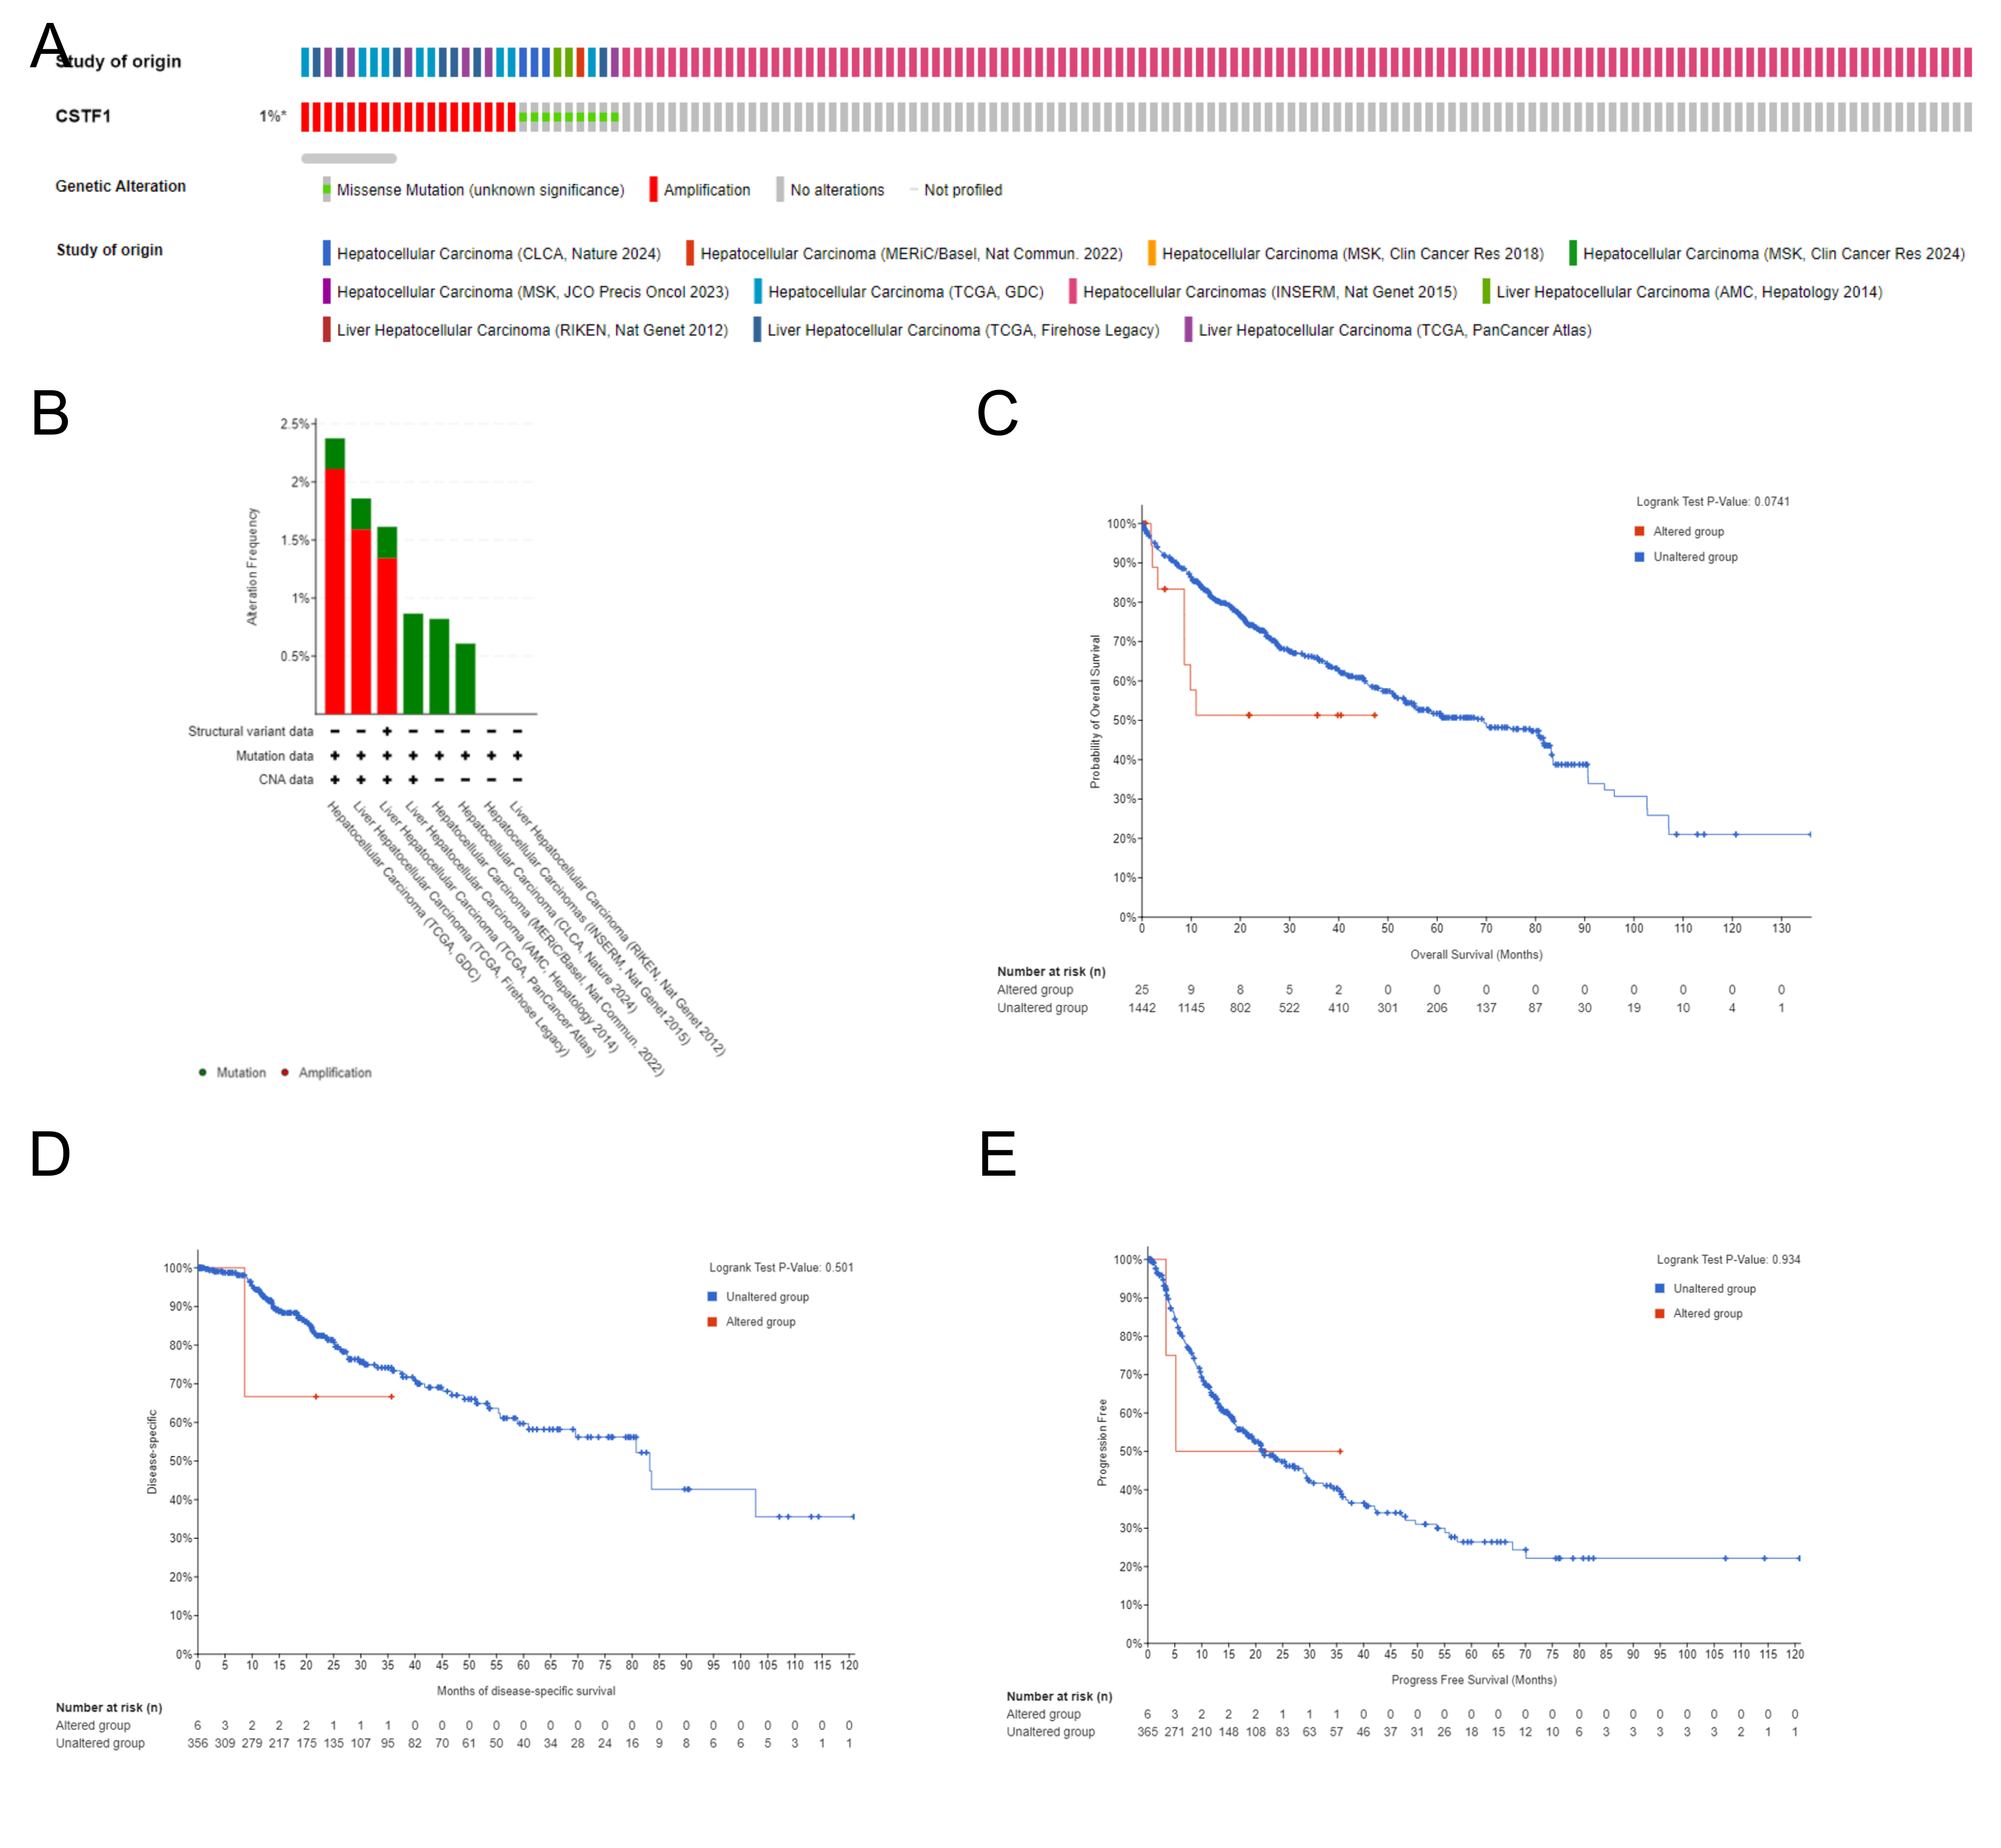
**

**Supplementary Figure 2. The mutation status of CSTF1 in HCC.** (A) Summarizing the alterations of CSTF1 in the HCC. (B) Mutation and amplification of CSTF1 in related databases. (C) CSTF1 related OS. (D) DSS of altered and unaltered groups. (F) PFI of CSTF1.

**Supplementary figure 3**


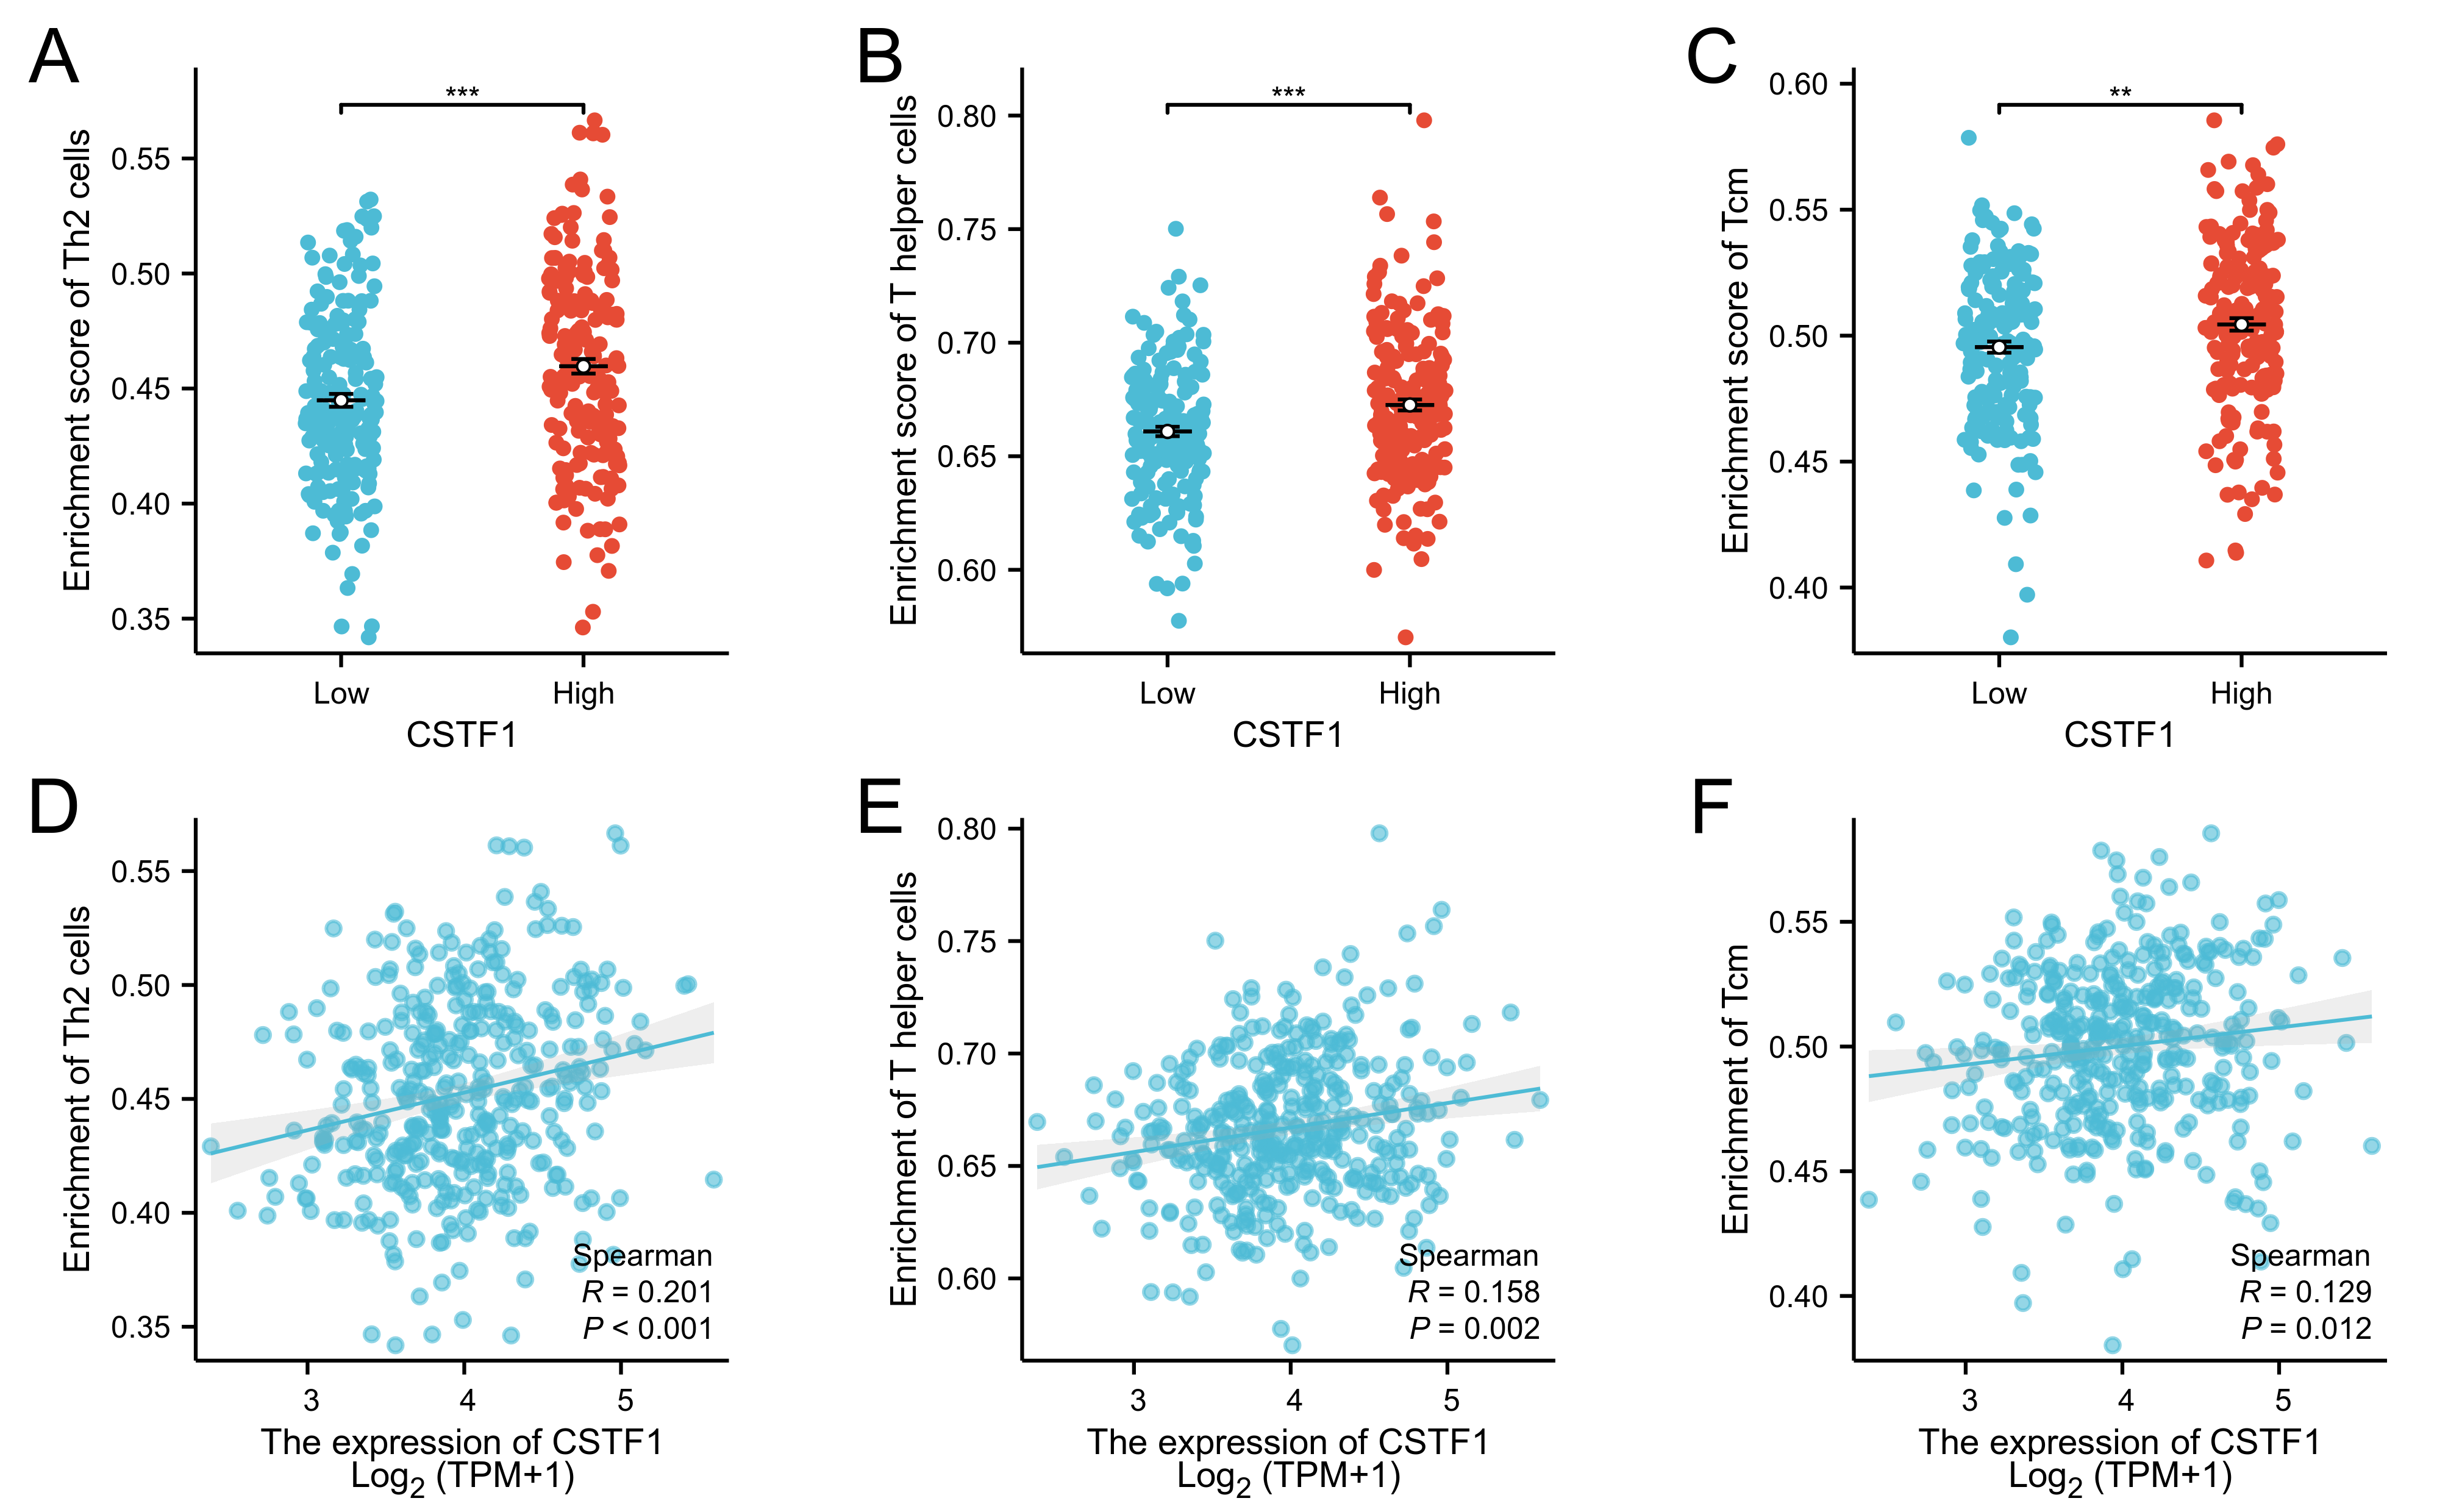


**Supplementary Figure 3. CSTF1 expression and tumor immune signature.** (A) Enrichment score of Th2 cells relative to CSTF1 expression. (B) Enrichment score of T helper cells concerning CSTF1 expression. (C) Enrichment score of Tcm cell in relation to CSTF1 expression. (D) Relationship between CSTF1 and infiltration of Th2 cells. (E) Association between CSTF1 and T helper cells. (F) Connection between CSTF1 and infiltration of Tcm cells.

**Supplementary figure 4**


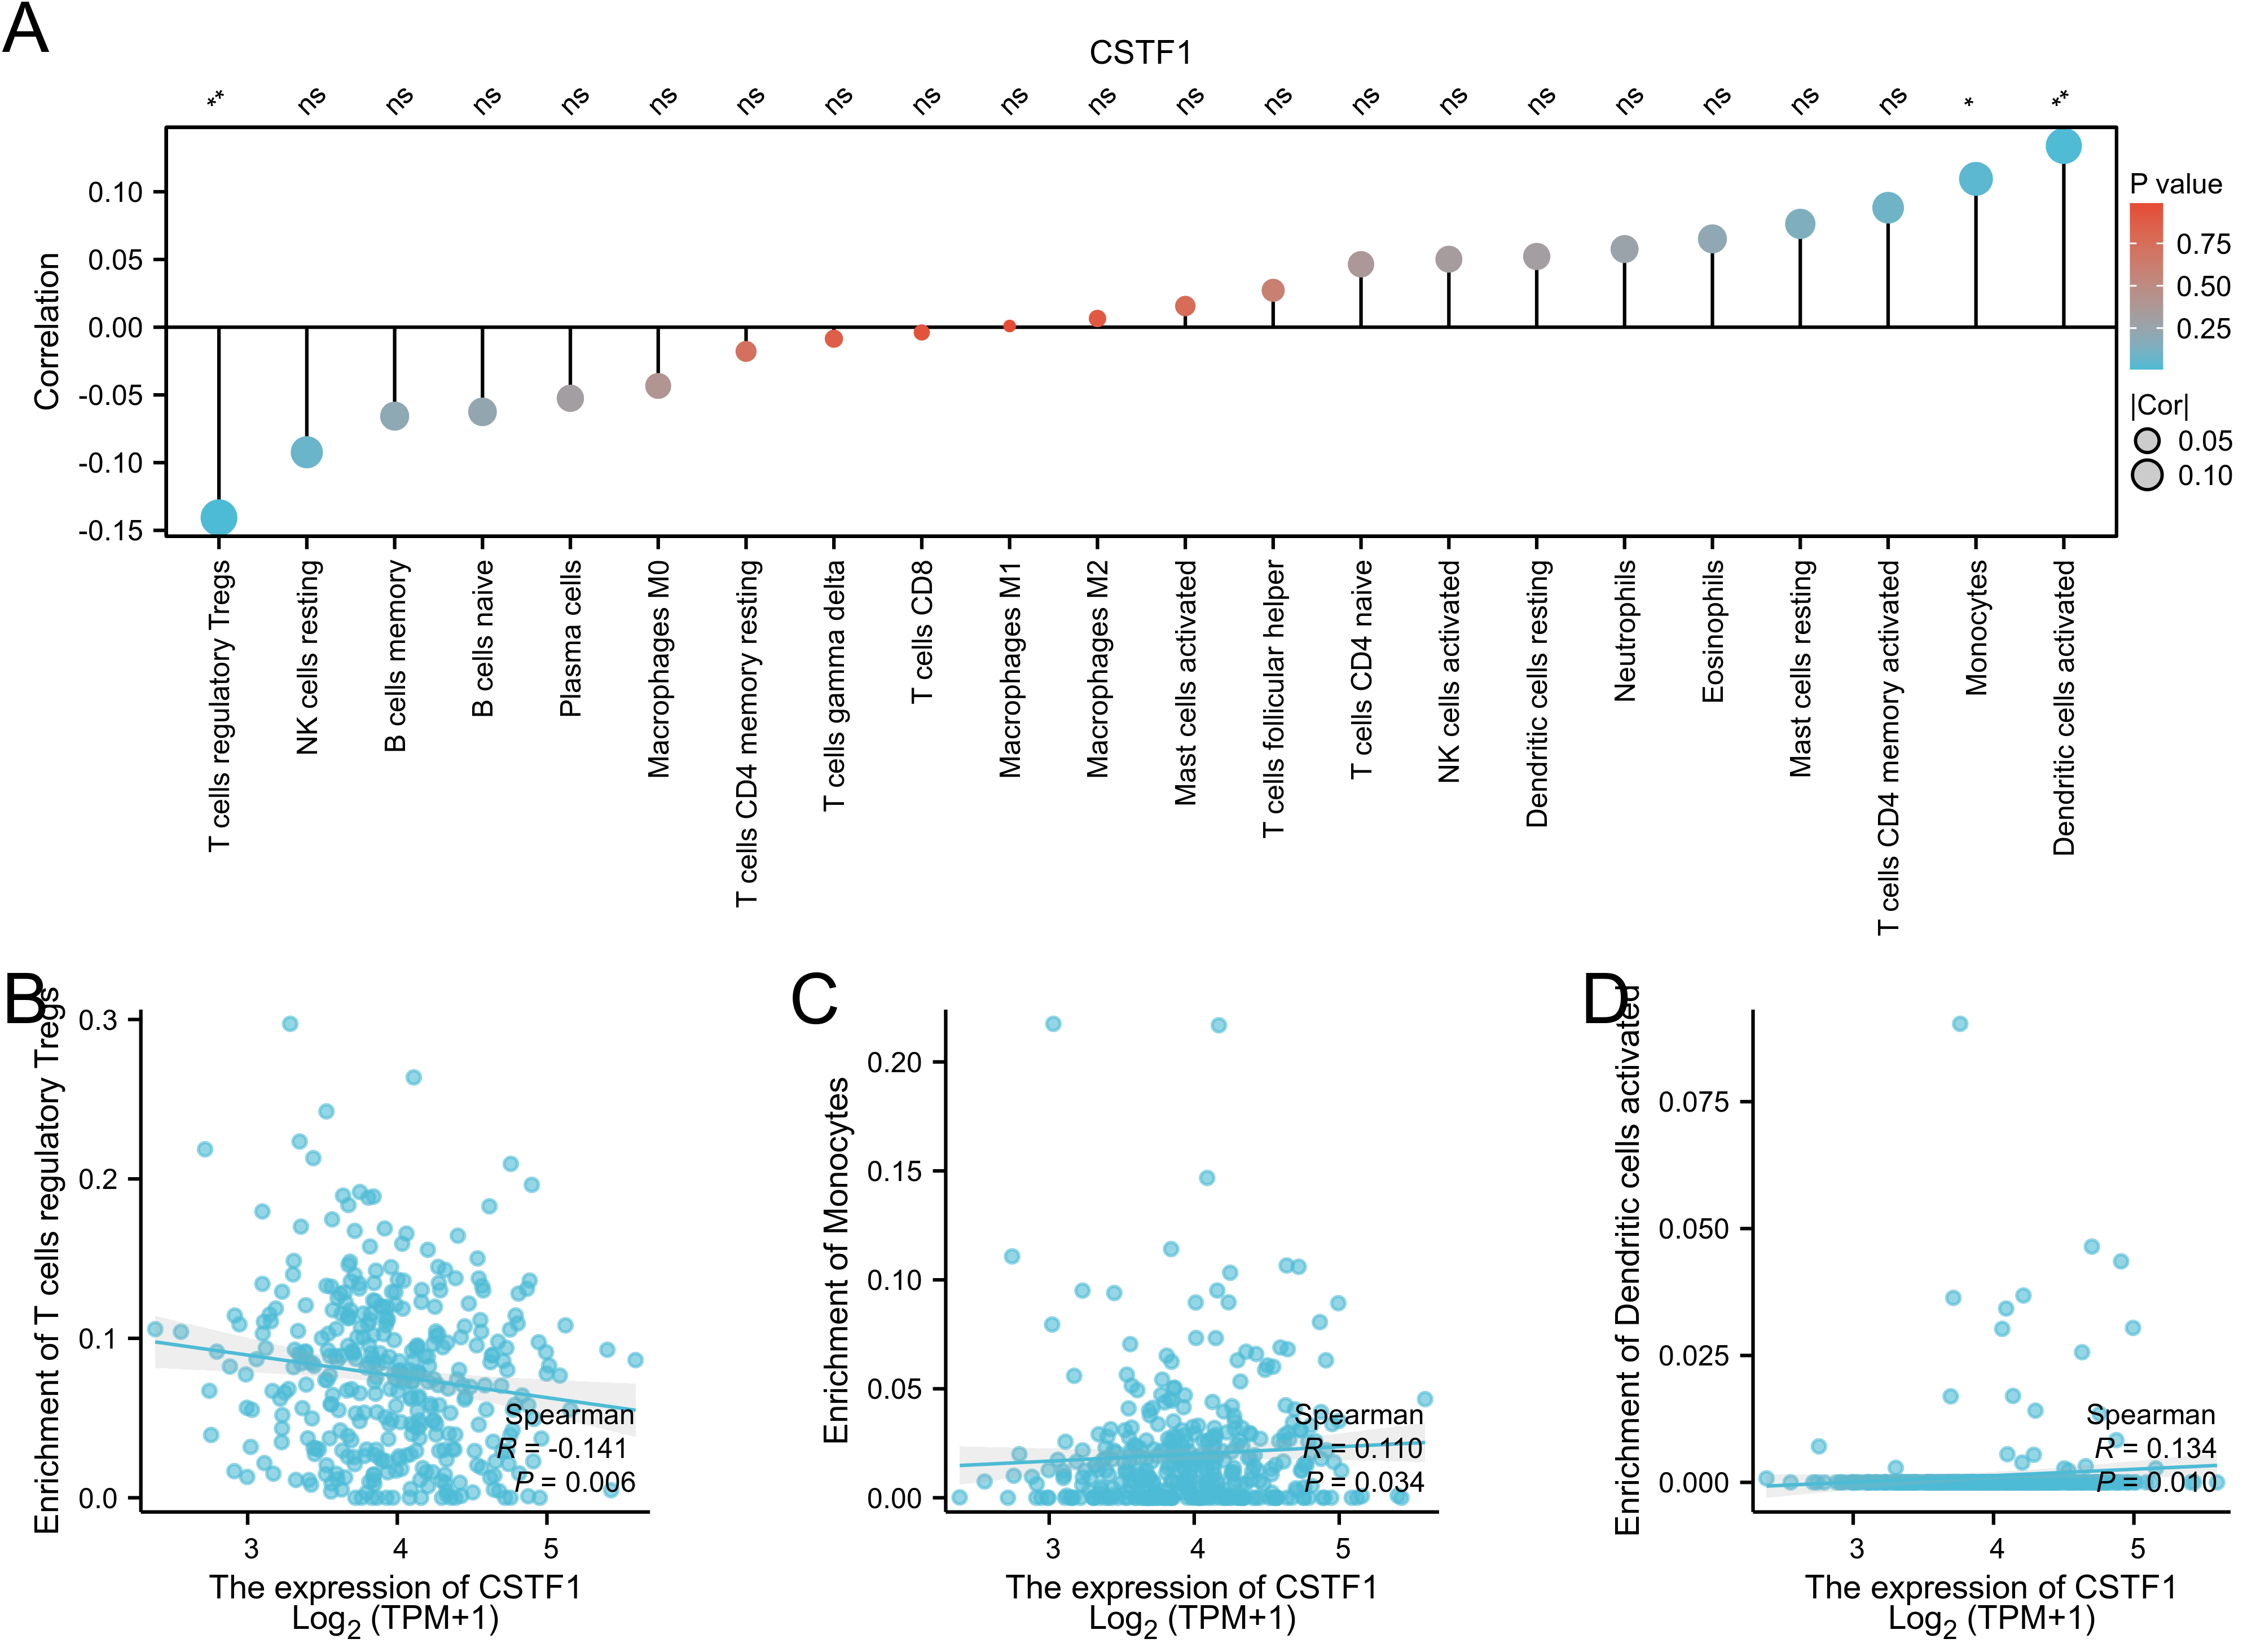


**Supplementary Figure 4. The CIBERSORT analysis of CSTF1 expression with various immune cell infiltrations.** (A) The association between CSTF1 expression and various immune cell infiltrations. (B) The enrichment of T cells regulatory Tregs. (C) The enrichment monocytes. (D) The enrichemnt of dendritic cells activated.

**Supplementary figure 5**


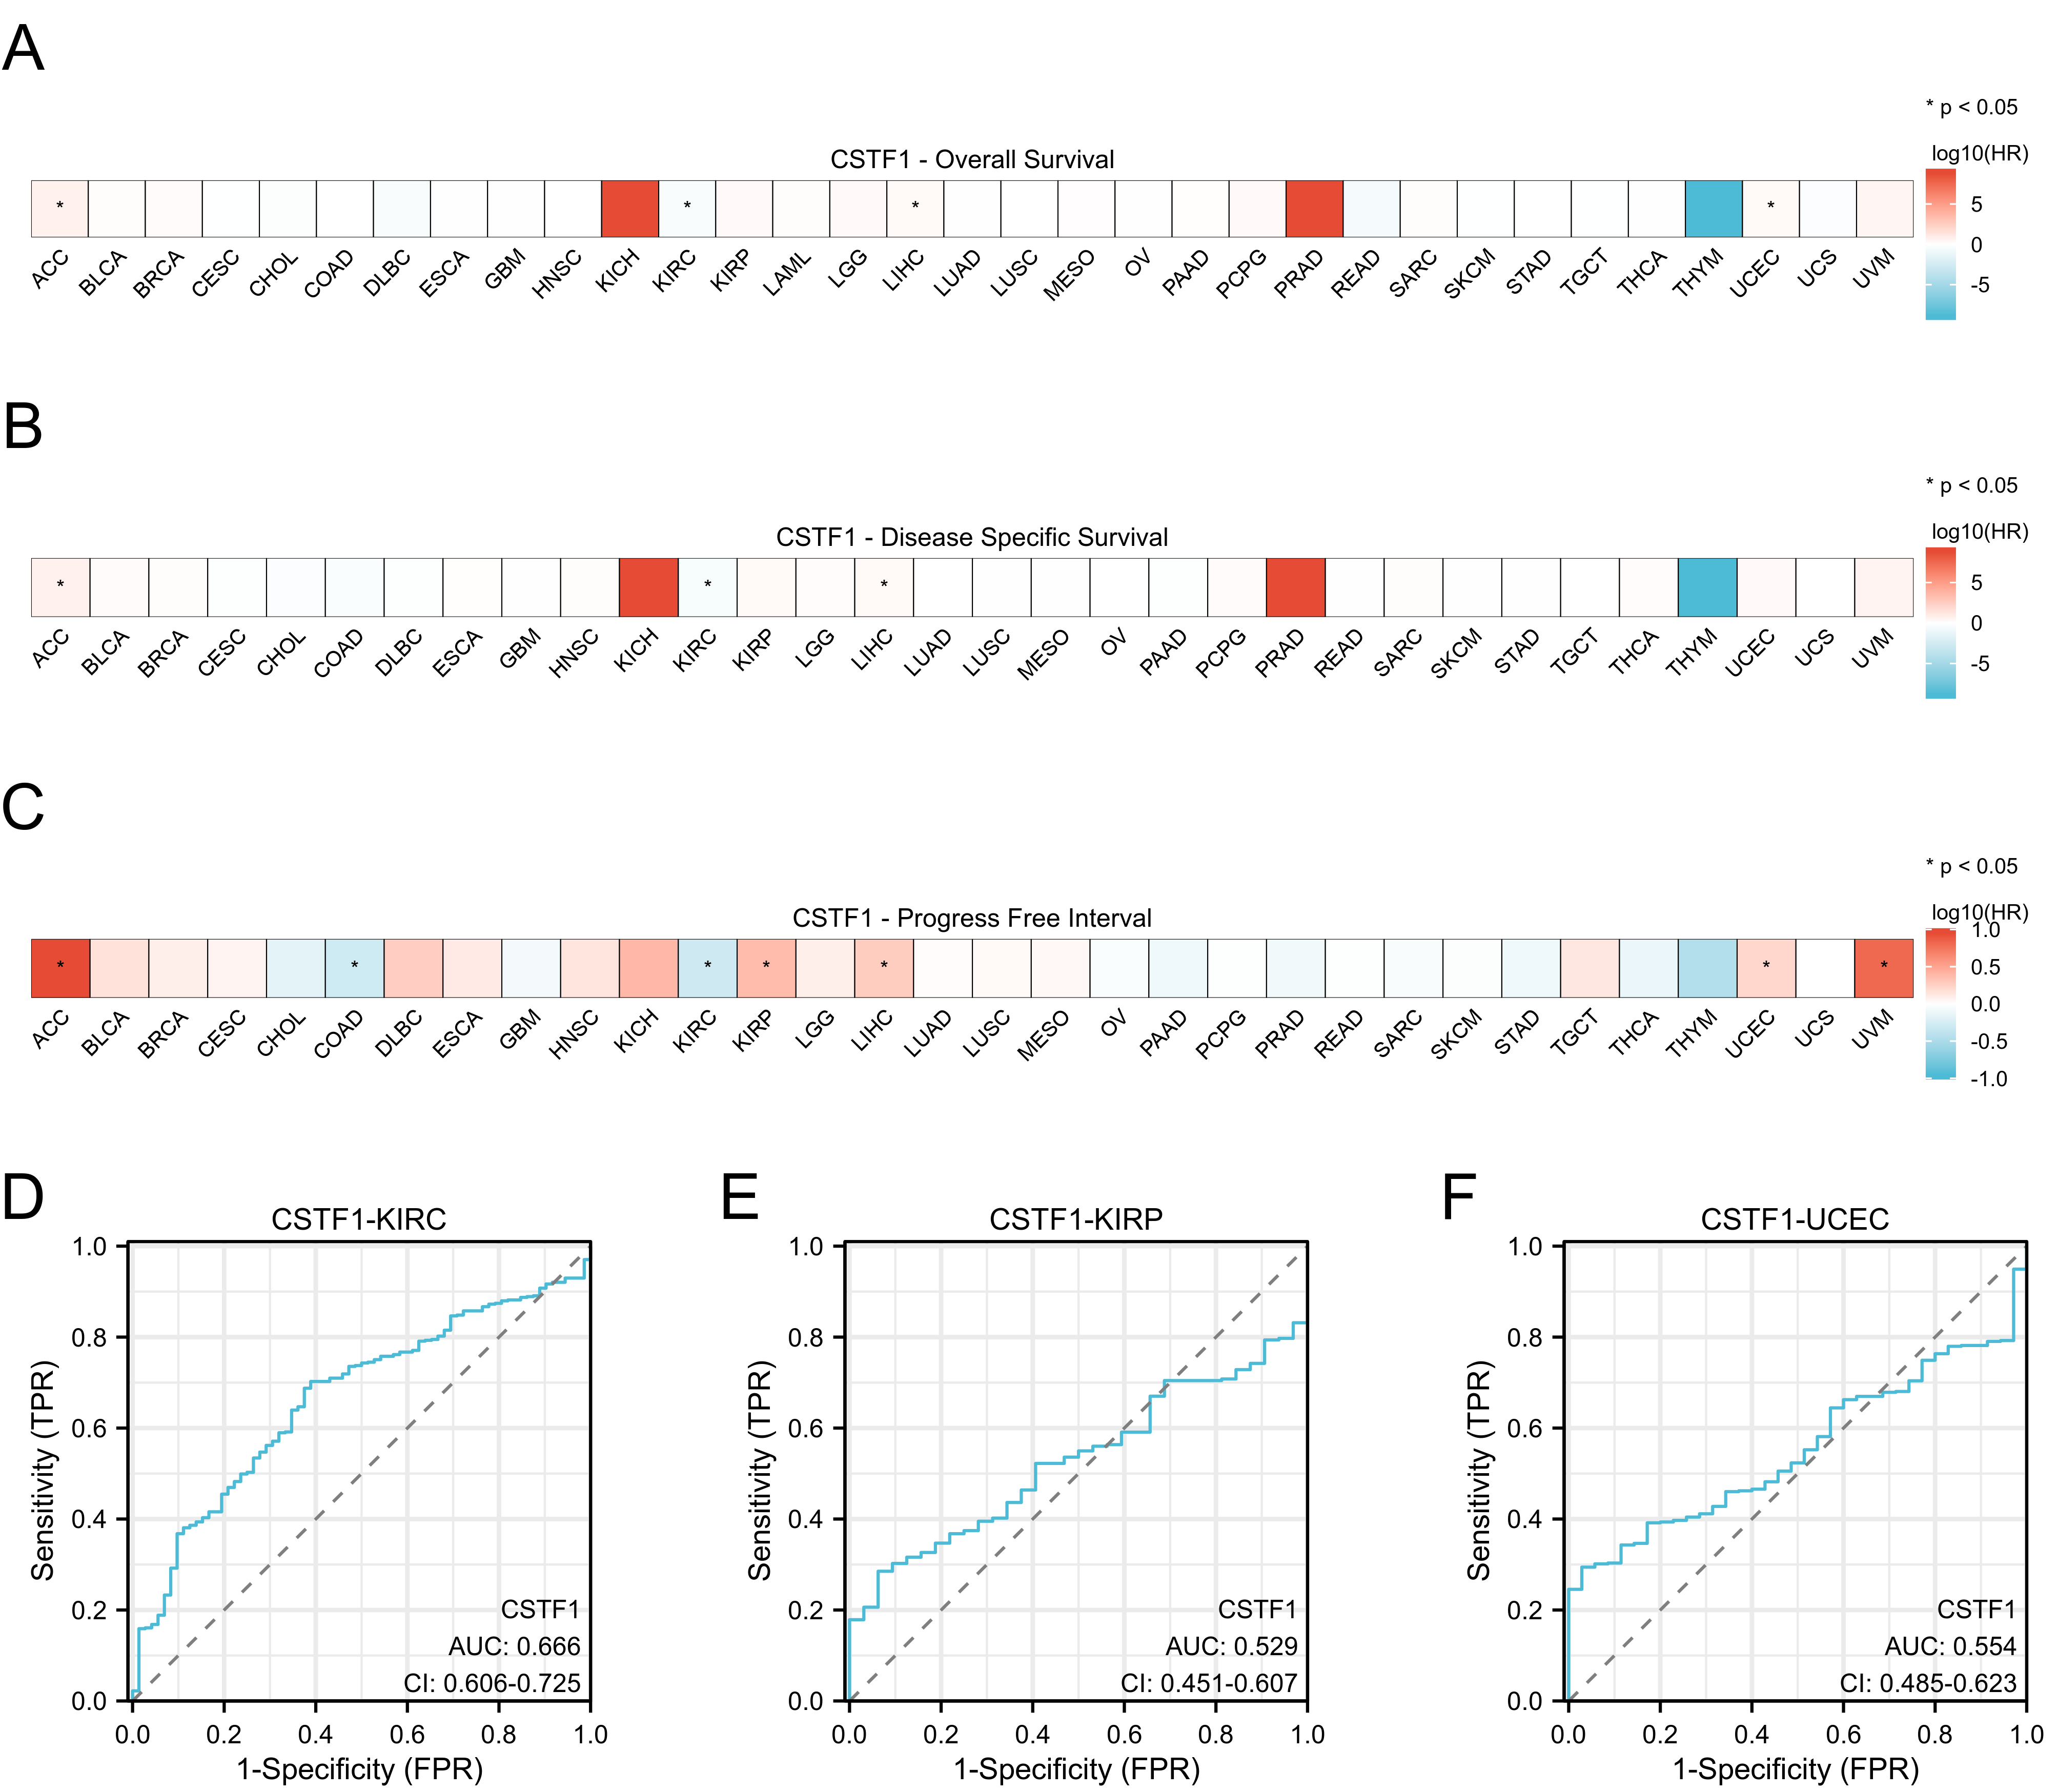


**Supplementary Figure 5. Prognostic significance of CSTF1 expression across various cancer types.** (A) OS rates. (B) DSS rates. (C) PFI rates. (D) ROC in KIRC. (E) ROC in KIRP. (F) ROC in UCEC.

**Supplementary figure 6**


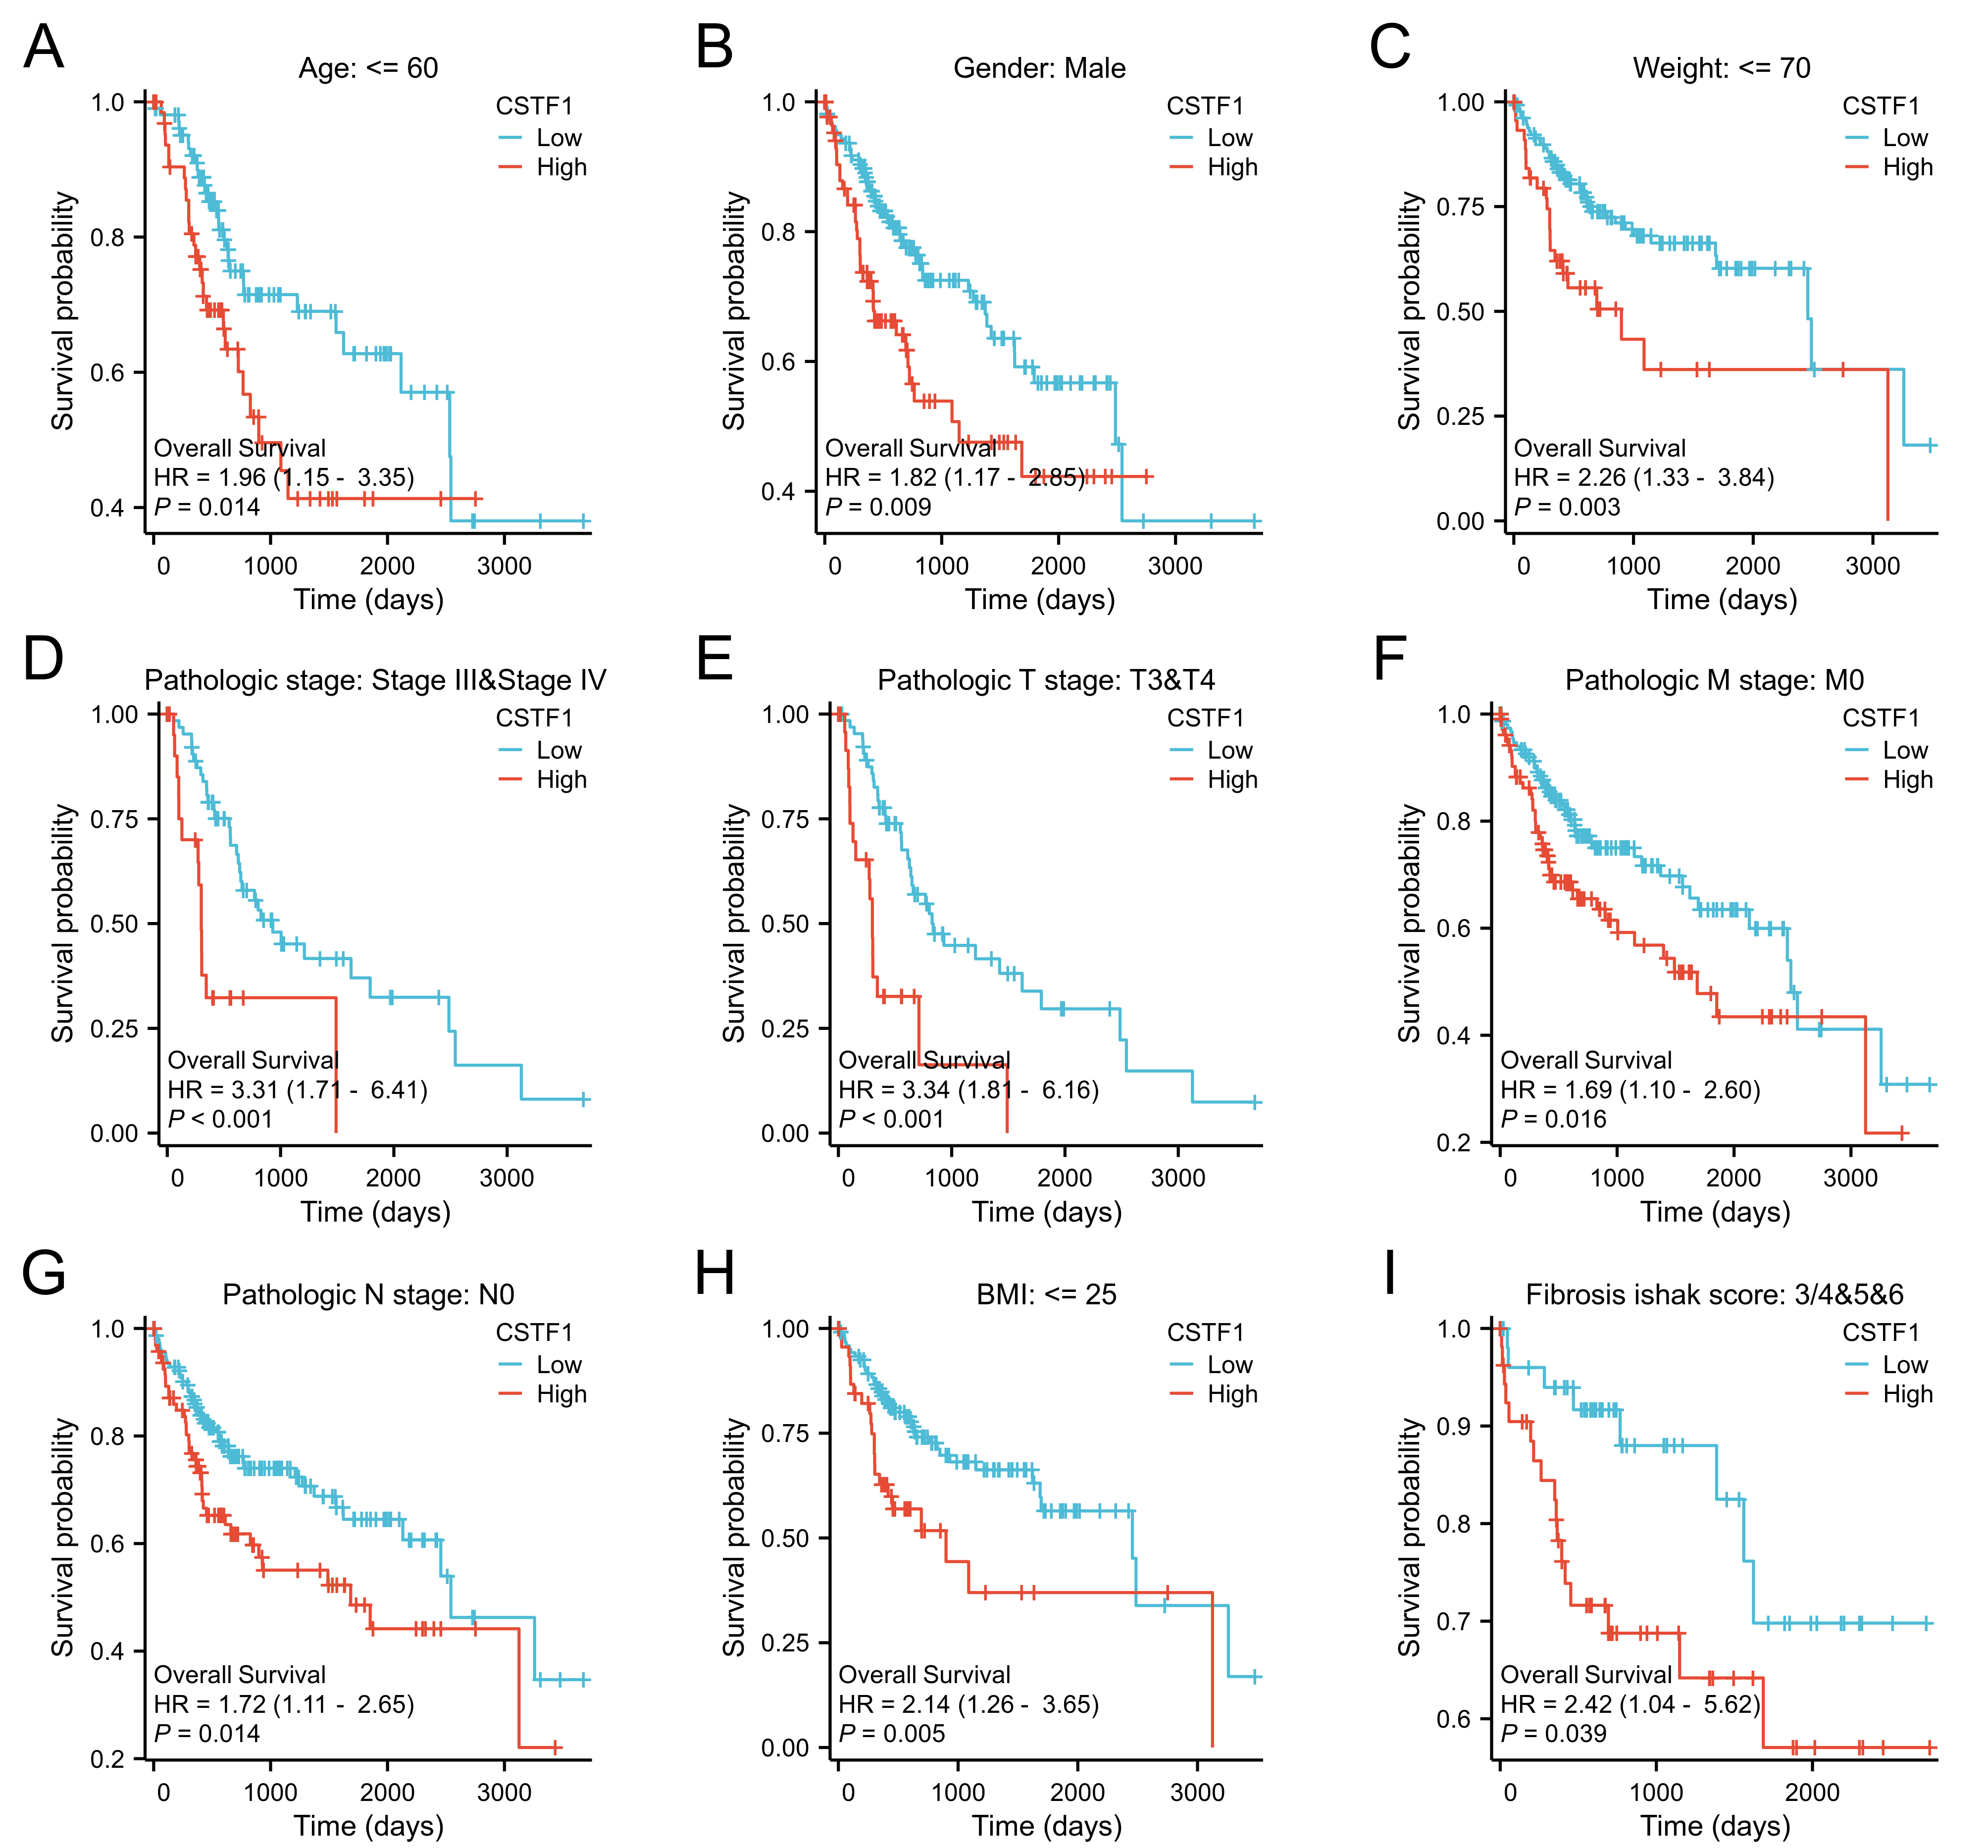


**Supplementary Figure 6. Prognostic significance of CSTF1 in different subgroups in HCC.** (A) Age <=60 years. (B) Gender, male. (C) Weight. (D) Pathological staging, III and IV. (E) Pathological T staging, T3&T4. (F) Pathological M staging, M0. (G) Pathological N staging, N0. (H) BMI<=25. (I) Ishak score of fibrosis: 3/4&5&6.

**Supplementary Table 1. The correlations between CSTF1 expression and HCC clinical features.**

| Characteristics | CSTF1-low | CSTF1-high | P |
| --- | --- | --- | --- |
| n | 187 | 187 |  |
| Gender, n (%) |  |  | 0.912 |
| Female | 60 (16%) | 61 (16.3%) |  |
| Male | 127 (34%) | 126 (33.7%) |  |
| Age, n (%) |  |  | 0.793 |
| <= 60 | 87 (23.3%) | 90 (24.1%) |  |
| > 60 | 99 (26.5%) | 97 (26%) |  |
| Pathologic stage, n (%) |  |  | 0.280 |
| I | 93 (26.6%) | 80 (22.9%) |  |
| II | 44 (12.6%) | 43 (12.3%) |  |
| III | 35 (10%) | 50 (14.3%) |  |
| IV | 3 (0.9%) | 2 (0.6%) |  |
| Pathological T staging, n (%) |  |  | 0.335 |
| T1 | 98 (26.4%) | 85 (22.9%) |  |
| T2 | 46 (12.4%) | 49 (13.2%) |  |
| T3 | 37 (10%) | 43 (11.6%) |  |
| T4 | 4 (1.1%) | 9 (2.4%) |  |
| Pathological N staging, n (%) |  |  | 0.693 |
| N0 | 121 (46.9%) | 133 (51.6%) |  |
| N1 | 1 (0.4%) | 3 (1.2%) |  |
| Pathologic M stage, n (%) |  |  | 1.000 |
| M0 | 129 (47.4%) | 139 (51.1%) |  |
| M1 | 2 (0.7%) | 2 (0.7%) |  |
| Weight, n (%) |  |  | **0.031** |
| <= 70 | 82 (23.7%) | 102 (29.5%) |  |
| > 70 | 91 (26.3%) | 71 (20.5%) |  |
| Height, n (%) |  |  | 0.861 |
| < 170 | 100 (29.3%) | 101 (29.6%) |  |
| >= 170 | 71 (20.8%) | 69 (20.2%) |  |
| BMI, n (%) |  |  | 0.143 |
| <= 25 | 81 (24%) | 96 (28.5%) |  |
| > 25 | 86 (25.5%) | 74 (22%) |  |
| Residual tumor, n (%) |  |  | 0.136 |
| R0 | 168 (48.7%) | 159 (46.1%) |  |
| R1&R2 | 6 (1.7%) | 12 (3.5%) |  |
| AFP(ng/ml), n (%) |  |  | 0.235 |
| <= 400 | 114 (40.7%) | 101 (36.1%) |  |
| > 400 | 29 (10.4%) | 36 (12.9%) |  |
| Vascular invasion, n (%) |  |  | 0.928 |
| No | 107 (33.6%) | 101 (31.8%) |  |
| Yes | 56 (17.6%) | 54 (17%) |  |
| Child-Pugh grade, n (%) |  |  | 0.886 |
| A | 113 (46.9%) | 106 (44%) |  |
| B&C | 11 (4.6%) | 11 (4.6%) |  |
| Fibrosis ishak score, n (%) |  |  | 0.635 |
| 0&1/2&3/4 | 69 (32.1%) | 65 (30.2%) |  |
| 5&6 | 39 (18.1%) | 42 (19.5%) |  |

**Supplementary Table 2. Cox Univariate, multivariate analyses of CSTF1 in OS in HCC.**

| Characteristics | Total(N) | Univariate | | Multivariate | |
| --- | --- | --- | --- | --- | --- |
| HR (95% CI) | P | HR (95% CI) | P |
| Pathological staging | 330 |  |  |  |  |
| I | 164 | Reference |  | Reference |  |
| II | 81 | 1.473 (0.885 - 2.452) | 0.136 | 3442600.5677 (0.000 - Inf) | 0.994 |
| III | 82 | 2.780 (1.798 - 4.299) | **< 0.001** | 2.428 (0.327 - 18.045) | 0.386 |
| IV | 3 | 4.617 (1.110 - 19.210) | **0.035** | 1.751 (0.130 - 23.588) | 0.673 |
| Pathological T staging | 330 |  |  |  |  |
| T1 | 165 | Reference |  | Reference |  |
| T2 | 83 | 1.425 (0.858 - 2.367) | 0.171 | 0.000 (0.000 - Inf) | 0.994 |
| T3 | 72 | 2.583 (1.648 - 4.049) | **< 0.001** | 0.944 (0.128 - 6.975) | 0.955 |
| T4 | 10 | 5.420 (2.399 - 12.242) | **< 0.001** | 1.902 (0.220 - 16.456) | 0.559 |
| Status of tumor | 330 |  |  |  |  |
| Tumor free | 193 | Reference |  | Reference |  |
| With tumor | 137 | 2.164 (1.462 - 3.201) | **< 0.001** | 1.674 (1.107 - 2.532) | **0.015** |
| CSTF1 | 330 |  |  |  |  |
| Low | 165 | Reference |  | Reference |  |
| High | 165 | 1.496 (1.019 - 2.197) | **0.040** | 1.286 (0.867 - 1.908) | 0.212 |

**Supplementary Table 3. Cox univariate, multivariate analyses of CSTF1 in DSS in HCC.**

| Characteristics | Total(N) | Univariate | | Multivariate | |
| --- | --- | --- | --- | --- | --- |
| HR (95% CI) | P | HR (95% CI) | P |
| Pathological staging | 340 |  |  |  |  |
| I | 169 | Reference |  | Reference |  |
| II | 84 | 1.559 (0.775 - 3.136) | 0.213 | 13869696.6207 (0.000 - Inf) | 0.996 |
| III | 83 | 4.281 (2.434 - 7.531) | **< 0.001** | 5.685 (0.748 - 43.219) | 0.093 |
| IV | 4 | 9.354 (2.167 - 40.372) | **0.003** | 5.713 (0.378 - 86.259) | 0.208 |
| Pathologic T staging | 340 |  |  |  |  |
| T1 | 171 | Reference |  | Reference |  |
| T2 | 86 | 1.471 (0.736 - 2.941) | 0.275 | 0.000 (0.000 - Inf) | 0.996 |
| T3 | 73 | 3.900 (2.199 - 6.916) | **< 0.001** | 0.717 (0.095 - 5.388) | 0.746 |
| T4 | 10 | 9.244 (3.424 - 24.958) | **< 0.001** | 1.525 (0.156 - 14.919) | 0.717 |
| CSTF1 | 340 |  |  |  |  |
| Low | 169 | Reference |  | Reference |  |
| High | 171 | 1.655 (1.014 - 2.703) | **0.044** | 1.561 (0.949 - 2.567) | 0.079 |

**Supplementary Table 4. Cox univariate, multivariate analyses of CSTF1 in PFI in HCC.**

| Characteristics | Total(N) | Univariate | | Multivariate | |
| --- | --- | --- | --- | --- | --- |
| HR (95% CI) | P | HR (95% CI) | P |
| Pathological staging | 330 |  |  |  |  |
| I | 164 | Reference |  | Reference |  |
| II | 81 | 1.879 (1.278 - 2.764) | **0.001** | 1.117 (0.061 - 20.526) | 0.941 |
| III | 82 | 2.733 (1.890 - 3.954) | **< 0.001** | 1.958 (0.267 - 14.374) | 0.509 |
| IV | 3 | 7.758 (2.402 - 25.052) | **< 0.001** | 3.182 (0.269 - 37.619) | 0.358 |
| Pathological T staging | 330 |  |  |  |  |
| T1 | 165 | Reference |  | Reference |  |
| T2 | 83 | 1.847 (1.260 - 2.706) | **0.002** | 1.426 (0.080 - 25.477) | 0.809 |
| T3 | 72 | 2.683 (1.834 - 3.924) | **< 0.001** | 1.033 (0.141 - 7.548) | 0.975 |
| T4 | 10 | 4.155 (1.887 - 9.149) | **< 0.001** | 0.950 (0.109 - 8.265) | 0.963 |
| Status of tumor | 330 |  |  |  |  |
| Tumor free | 193 | Reference |  | Reference |  |
| With tumor | 137 | 11.404 (7.563 - 17.194) | **< 0.001** | 10.772 (7.067 - 16.419) | **< 0.001** |
| CSTF1 | 330 |  |  |  |  |
| Low | 165 | Reference |  | Reference |  |
| High | 165 | 1.463 (1.074 - 1.992) | **0.016** | 1.012 (0.737 - 1.389) | 0.941 |
